# Supplementary material
Source: publisher figshare collection journal article supplement (https://karger.figshare.com/ndownloader/files/25037939)
Supplement: Supplementary file 1 [file 25037939]

# Verwendete Suchstrategien nach Datenbanken

| 1 | Kneipp.ab,ti. |
| --- | --- |
| 2 | "Kneip*".ab,ti. |
| 3 | "Kneipp*".ab,ti. |
| 4 | 1 or 2 or 3 |
| 5 | "therap*".ab,ti. |
| 6 | "intervent*".ab,ti. |
| 7 | "cure*".ab,ti. |
| 8 | "treat*".ab,ti. |
| 9 | "kur*".ab,ti. |
| 10 | "Anwend*".ab,ti. |
| 11 | "Behand*".ab,ti. |
| 12 | "applic*".ab,ti. |
| 13 | "hydrotherap*".ab,ti. |
| 14 | 5 or 6 or 7 or 8 or 9 or 10 or 11 or 12 or 13 |
| 15 | "effect*".ab,ti. |
| 16 | "evidence*".ab,ti. |
| 17 | "evaluat*".ab,ti. |
| 18 | "effic*".ab,ti. |
| 19 | "influenc*".ab,ti. |
| 20 | "calculat*".ab,ti. |
| 21 | "importan*".ab,ti. |
| 22 | "affect*".ab,ti. |
| 23 | "outcome*".ab,ti. |
| 24 | "improve*".ab,ti. |
| 25 | "reduc*".ab,ti. |
| 26 | 15 or 16 or 17 or 18 or 19 or 20 or 21 or 22 or 23 or 24 or 25 |
| 27 | 4 and 14 |
| 28 | 26 and 27 |
| 29 | limit 28 to yr="2000 -Current" |
| 30 | limit 29 to (english or german) |
| 31 | limit 30 to (male or female or humans) |
| 32 | limit 31 to journal article [Limit not valid in Embase; records were retained] |

Tabelle e1: Suchstrategie Embase

| # 1 | TOPIC: (Kneipp) |
| --- | --- |
| # 2 | TOPIC: (Kneipp*) |
| # 3 | TOPIC: (Kneip*) |
| # 4 | #3 OR #2 OR #1 |
| # 5 | TOPIC: (therap*) OR TOPIC: (intervent*) OR TOPIC: (cure*) OR TOPIC: (treat*) OR TOPIC: (kur*)  OR TOPIC: (Anwend*) OR TOPIC: (Behand*) OR TOPIC: (applic*) OR TOPIC: (hydrotherap*) |
| # 6 | TOPIC: (effect*) OR TOPIC: (evidence*) OR TOPIC: (evaluat*) OR TOPIC: (effic*) OR  TOPIC: (influenc*) OR TOPIC: (calculat*) OR TOPIC: (importan*) OR TOPIC: (affect*) OR  TOPIC: (outcome*) OR TOPIC: (improve*) OR TOPIC: (reduc*) |
| # 7 | #5 AND #4 |
| # 8 | #7 AND #6 |
| # 9 | #7 AND #6  Refined by: PUBLICATION YEARS: ( 2018 OR 2010 OR 2004 OR 2017 OR 2009 OR 2003 OR 2016  OR 2007 OR 2002 OR 2015 OR 2005 OR 2001 OR 2014 ) AND LANGUAGES: ( ENGLISH OR GERMAN ) |

Tabelle e2: Suchstrategie Web of Science

| ID | Search |
| --- | --- |
| #1 | (Kneipp*):ti,ab,kw OR (Kneip*):ti,ab,kw OR (Kneipp):ti,ab,kw (Word variations have been searched) |
| #2 | (therap*):ti,ab,kw OR (intervent*):ti,ab,kw OR (cure*):ti,ab,kw OR (treat*):ti,ab,kw OR (kur*):ti,ab,kw (Word variations have been searched) |
| #3 | (Anwend*):ti,ab,kw OR (Behand*):ti,ab,kw OR (applic*):ti,ab,kw OR (hydrotherap*):ti,ab,kw (Word variations have been searched) |
| #4 | #2 or #3 |
| #5 | (effect*):ti,ab,kw OR (evidence*):ti,ab,kw OR (evaluat*):ti,ab,kw OR (effic*):ti,ab,kw OR (influenc*):ti,ab,kw (Word variations have been searched) |
| #6 | (calculat*):ti,ab,kw OR (importan*):ti,ab,kw OR (affect*):ti,ab,kw OR (outcome*):ti,ab,kw AND (improve*):ti,ab,kw (Word variations have been searched) |
| #7 | (reduc*):ti,ab,kw (Word variations have been searched) |
| #8 | #5 or #6 or #7 |
| #9 | #1 and #4 |
| #10 | #9 and #8 with Publication Year from 2000 to 2019, in Trials |

Tabelle e3: Suchstrategie Cochrane

| ID | Search |
| --- | --- |
| #1 | Kneipp* or Kneip* |
| #2 | Jahr > 2000 |

Tabelle e4: Suchstrategie CAMbase

| ID | Search |
| --- | --- |
| #1 | tst="Kneipp*" or tst="Kneipp" |
| #2 | vollständiger Titel |
| #3 | Jahr 2000-2019 |

Tabelle e5: Suchstrategie DNB

| ID | Search |
| --- | --- |
| #1 | (kneipp AND (therapy OR intervention OR cure OR treatment) AND (effect OR evidence OR evaluation OR efficacy)) AND PY=2000:2019 |

Tabelle e6: Suchstrategie LIVIVO

| ID | Search |
| --- | --- |
| #1 | kneipp AND [therapy OR intervention OR cure OR treatment] AND [effect OR evidence OR evaluation OR efficacy] -raman -bacterial -"Kneipp Werke" -"brain injury" -aphasia -"Kneipp S" -chemical -chemistry -"Kneipp J" -cancer -"Kneipp SM" -Shawn -author:Kneipp |
| #2 | Zeitraum 2000 – 2019, Deutsch und Englisch, keine Patente, keine Zitate |

Tabelle e7: Suchstrategie Google Scholar-Volltexte
